1 **Genetic and genomic analysis of early abortions in Israeli dairy cattle**

2

3 **Genetic analysis of early abortions in dairy cattle**

4

5 Moran Gershoni<sup>1</sup>, Ephraim Ezra<sup>2</sup> and Joel Ira Weller<sup>1,2\*</sup>

6

7

8 <sup>1</sup>Department of Ruminant Science, Institute of Animal Sciences, Agricultural Research

9 Organization, the Volcani Center, Rishon LeZion, Israel

10

11 <sup>2</sup> Israeli Cattle Breeders Association, Caesarea Industrial Park, Israel

12

13

14 \* Corresponding author

15 E-mail: [joel.weller@mail.huji.ac.il](mailto:joel.weller@mail.huji.ac.il)

16

17

## 18 **Abstract**

19

20 Female infertility accounts for at least 50% of all human infertility cases. One of the causes  
21 contributing for female infertility is embryo loss after fertilization. Previous findings suggested  
22 that more than half of fertilizations results in embryo loss before pregnancy is detected. Dairy  
23 cattle may be a useful model for study of the genetic architecture of this trait. In advanced  
24 commercial populations, all breeding is by artificial insemination, and extensive records of the  
25 cows' estrus, insemination and pregnancies are available. We proposed re-insemination between  
26 49 and 100 days after the first insemination as an indicator trait for early abortion in dairy cattle,  
27 based on the mean estrus interval of 21 days. Israeli Holstein cows scored as early abortion were  
28 compare to cows recorded as pregnant from the first insemination. This trait was compare to  
29 conception rate from first insemination. Animal model variance components were estimated by  
30 REML, including parents and grandparents of cows with records. First parity heritability for  
31 conception rate was 3%. In the multi-trait analysis of parities 1-3 for abortion rate heritabilities  
32 ranged from 8.9% for first parity to 10.4% for second parity. The variance component for the  
33 service sire effect for abortion rate were less than half the variance component for conception  
34 rate. Thus genetic control of the two traits is clearly different. Genome wide association study  
35 were performed based on the genetic evaluations of ~1200 sires with reliabilities >50%. The  
36 markers with the lowest probabilities for early abortion were also included among the markers  
37 with the lowest probabilities for conception rate, but not vice versa. The marker explaining the  
38 most variance for abortion rate is located within the ABCA9 gene, which is found within an  
39 ABC genes cluster. The ATP-binding cassette family is the major class of primary active  
40 transporters in the placenta.

41

## 42 **Author summary**

43

44       Approximately 70% of human conceptions fail to achieve viability. Almost 50% of all  
45 pregnancies end in miscarriage before the clinical recognition of a missed period. Cattle are a  
46 useful model for human female reproductive processes, because of the similarities in the  
47 reproductive cycles, and the extensive documentation in commercial cattle populations,  
48 including estrus and insemination records. In addition to the expected benefits from cow fertility  
49 research for human biomedical applications, fertility is an economically important trait in dairy  
50 cattle with very low heritability. The mean estrous interval for cattle is 21 days. We therefore  
51 proposed re-insemination between 49 and 100 days after the first insemination as an indicator  
52 trait for early abortion. Israeli Holstein cows scored as having early abortion based on first  
53 insemination after parturition were compare to cows recorded as pregnant from the first  
54 insemination. Heritability for early abortion rate was three-fold the heritability for conception  
55 rate. In a genome wide association study based on 1200 dairy bulls genotyped for 41,000  
56 markers, six markers were found with nominal probabilities of  $< 10^{-12}$  to reject the null  
57 hypothesis of no effect on early abortion rate. Early abortion rate may be a useful indicator trait  
58 for improvement of fertility in dairy cattle.

59

## 60 **Introduction**

61

62       Genetic factors that reduce the ability of an individual to reproduce are expected to be  
63 under intensive negative selection, and therefore to remain rare in the population. It is thus

64 surprising that in humans about 15% of the reproductive age couples cannot achieve successful  
65 pregnancy without medical assistance [1, 2]. This is partially due to the polygenic and sexually  
66 differentiate nature of this trait [3 ,4]. Female infertility apparently accounts for more than half  
67 of the cases [5]. Previous studies have suggested that the chances of a woman to achieve a  
68 successful pregnancy per menstrual cycle is approximately 25% [6, 7]. Among other causes, the  
69 lack of detected pregnancy could be the result of early abortion (EA). Approximately 70% of  
70 human conceptions fail to achieve viability, with almost 50% of all pregnancies ending in  
71 miscarriage before the clinical recognition of a missed period, or the presence of embryonal heart  
72 activity [8, 9]. This complicates the study of EA in humans, although it is likely to have a large  
73 impact on human fertility.

74 Cattle were found to be a useful model for human female reproductive processes, mainly  
75 because of the similarities in the reproductive cycles [10]. Within this context, cows were used in  
76 studies on ovarian function [11], effects of ageing on fertility [12], embryo-maternal  
77 communication [13, 14], pregnancy maintenance and irregularities associated with assisted  
78 reproduction techniques [15, 16]. The extensive documentation in many commercial cattle  
79 populations, including estrus and insemination records, provides a good opportunity to  
80 investigate the genetics of EA. In addition, each ejaculation is evaluated by AI labs, and  
81 defective semen is rejected. Thus, the service sire has only a very minor effect on conception  
82 rate [17]. Furthermore, fertility is an economically important trait in dairy cattle [18].

83 Like all economic traits in dairy cattle, genetic evaluation of fertility is based on field  
84 records. Unlike milk production traits and somatic cell concentration, there is no accepted  
85 consensus on how fertility should be scored. Traditionally the most common criterion was “non-  
86 return rate,” the fraction of cows that were not re-inseminated within a specific time interval.

87 This criterion ignored cows that were culled after the first insemination [19]. More recent  
88 measures have considered the time laps from first insemination to pregnancy or some function of  
89 the number of times a cow is inseminated during the lactation [20]. Nearly all measures of  
90 female fertility have very low heritability, in the range of 1 to 4% [18, 20].

91 Although abortions are recorded in Israel, very few first trimester abortions are noted  
92 either by the herd manager or the attending veterinarian. Indeed, previous studies in other  
93 populations estimated fertilization rate as greater than 75%, while the conception rate (CR) was  
94 approximately 35% [21]. The differences between these two observations are likely due to  
95 pregnancy loss that occur in more than 50%

96 Since genotyping of large numbers of animals with high density SNP chips has become  
97 routine, a number of recessive lethal alleles have been detected in commercial dairy cattle  
98 populations, which result in early term abortions [25]. Detection was originally based on the  
99 lack of homozygotes for the haplotype harboring the lethal allele, and a reduction in fertility rate  
100 for daughters of sires that received this haplotype. In several cases the causative polymorphism  
101 has been determined, e. g. [26]. Since the abortion is generally not observed, pregnancies of  
102 fetuses homozygous for the lethal alleles are recorded as “non-conception.”

103 Many studies have shown that the average estrous interval in dairy cattle is 21 days [27].  
104 Thus, most cows that do not conceive in the first service should be re-inseminated approximately  
105 21 days later. The number of days between first and second insemination for first parity were  
106 previously shown with a peak at 21 days, and a secondary peak around 42 days, which  
107 corresponds to 2 estrus cycles. Despite these two prominent peaks, a significant number of cows  
108 were re-inseminated at >45 days after the first insemination [28]. Although these late  
109 inseminations may be due to non-conception at the first insemination, and lack of observed

110 estrous at the expected interval; another explanation is: conception at the first insemination, and  
111 early term abortion due to embryonic lethality or female factors increasing the predisposition for  
112 embryonic death.

113 One way to test this hypothesis is to demonstrate that the genetic factors that control long  
114 intervals between first and second inseminations are different from the genetic factors that  
115 control conception, and to evaluate the genetic contributions of the cow and the service sire. The  
116 objectives of this study were a genetic and genomic analysis of cows with long intervals between  
117 first and second insemination, as compared to cows recorded as conceiving at first insemination;  
118 and comparison of this trait to CR at first insemination.

119

## 120 **Results**

121

122 To define long interval between inseminations as indication for EA, we first analyzed the  
123 distribution of the insemination interval in Israeli-Holstein cows that were inseminated more than  
124 once (Fig 1). The distribution of the insemination interval was similar to previously reported  
125 [28]. Therefore, we defined EA as occurring when the cow was re-inseminated between 49-100  
126 days after the first insemination (see also in the material and methods section). This interval was  
127 previously suggested to represent embryonic death in most instances [29].

128 Effects of insemination month on conception and abortion rate as computed from the  
129 REML analyses of data sets one and two are shown in Fig 2. Effects were set to zero for  
130 December. Generally, the effects were similar for both traits, with major reductions in the late  
131 summer, August and September. These results correspond to previous results for the effect of  
132 insemination month on CR of Israeli Holsteins [17].

133 Estimates of variance components from the REML analyses of data sets one through four,  
134 and the heritabilities are given in Table 3. First parity heritabilities were 3.0% for CR from first  
135 insemination, but 7.7% for EA. For CR with assumed abortions deleted from the analysis,  
136 heritability for CR decreased to 2.6%. In the multi-trait analysis of parities 1-3 for EA  
137 heritabilities ranges from 8.9% for first parity to 10.4% for second parity, but differences among  
138 the parities were not significant. The variance components for the service sire were 8.6 and 10.1  
139 for the two analyses of conception, but  $\leq 3.5$  for all the EA analyses. Although the service sire  
140 can effect EA by transfer of recessive lethal alleles to the fetus [25], the service sire factor  
141 apparently does not explain a major proportion of the genetic variance for EA. The additive  
142 genetic variance of the inseminated cow for EA is ~50 times greater than the variance of the  
143 service sire, as opposed to 8-fold for CR. Thus genetic control for the two traits is clearly  
144 different.

145 The genetic and environmental correlations among the three parities for the data set 4  
146 analysis are given in Table 4. All genetic correlations were  $> 0.9$ , while all environmental  
147 correlations were  $< 0.12$ . Thus analysis by the single trait animal model is justified, with the  
148 variance ratios given in the methods section.

149 Correlations between breeding values for non-EA rate from data set 5 and the Israeli  
150 breeding index, PD16, and the other economic traits computed for Israeli Holsteins are given in  
151 Table 5. All correlations were significantly different from zero, except for the correlations with  
152 fat and protein production. The correlation with PD16 was 0.115. Thus selection for the index  
153 should have resulted in a decrease in abortion rate. The regression of the breeding value for non-  
154 EA rate on the cows' birth year was 0.083% per year ( $P < 0.001$ ), that is a decrease of close to  
155 0.1% per year. The highest correlation was with female fertility, 0.75; but the correlation with

156 herd-life was also 0.3. Correlations among breeding values tend to slightly underestimate the  
157 actual genetic correlations, due to incomplete reliabilities of the evaluations.

158 Mean phenotypic and breeding values of non-EA rate for first parity cows by birth year  
159 are given in Fig 3. Although the overall regression of breeding value was positive for non-EA  
160 rate, EA rate increased until 1994, and then decreased beginning in 2002. These changes  
161 correspond to changes in the Israeli breeding index. Until 1996 the index included only milk  
162 production traits. Somatic cell score was added in 1996, and female fertility in 2000; which now  
163 accounts for 14% of the index. A lag of ~2 years between inclusion of a trait in the index and a  
164 change in the effective direction of selection is expected. The regression of breeding value on  
165 birth date for cows born since 2002 was 0.53% per year, as opposed to 0.083% since 1983. No  
166 clear trend is evident for the phenotypic means of first parity EA rate.

167 The “Manhattan Plot” for the genome wide association study (GWAS) results for EA rate  
168 are given in Fig 4, and the markers with the lowest probability values are presented in Table 6.  
169 There were eight markers with nominal probabilities  $< 10^{-11}$ . All of these markers has  
170 probabilities  $< 10^{-6}$  after permutation analysis and correction for multiple testing. Of the 8  
171 markers listed, the 2 markers on chromosome 7 and the 2 markers on chromosome 17 are clearly  
172 due to a single quantitative trait locus segregating on each chromosome, since the distance  
173 between the two markers on each chromosome is  $< 100,000$  base pairs. Each of these 8 markers  
174 explained between 5 and 4% of the variance for the genetic evaluations for EA rate, and  $> 2.5\%$   
175 of the variance for CR. None of these chromosomal regions were found to have significant  
176 effects on cow conception rate or daughter pregnancy rate in the analysis of the US Holstein  
177 population by the posteriori granddaughter design [30].



178           While all of the 30 markers with probabilities  $< 10^{-8}$  for EA are also significantly  
179 associated with CR, only subset of the markers with probabilities  $< 10^{-12}$  for CR are also  
180 significantly associated with EA (Fig 5). The effects of these 30 markers on EA on their effects  
181 on CR is plotted in Fig 6. The regression was 2.0 with a coefficient of determination of 0.97.  
182 Thus the substitution effect for EA was generally twice the effect for CR.

183

## 184 **Discussion**

185

186           Reduce fertility is a major concern in humans, and a highly important economic trait in  
187 dairy cattle. Previous studies suggested that a large portion of recorded non-conceptions in  
188 human and cattle are apparently the result of unrecognized EA [8, 9, 21]. In this study we used  
189 the extensive records of the Israeli dairy cattle population to study the genetics and the genomics  
190 of EA and to assess its association with CR.

191           CR can be affected by the service sire and/or by the dam inseminated. In cattle, the service  
192 sire can effect CR either via the quality of semen, or via genes that reduce embryo survival rate.  
193 With respect to EA, the effect of the sire is limited to genes affection embryo survival rate. The  
194 variance of the service sire effect on CR is approximately three-fold the variance of the service  
195 sire effect on EA rate (Table 3). This suggests that most of the service sire effect on CR is due to  
196 semen quality, otherwise the service sire variance component should have been of similar  
197 magnitude to the variance component for EA. Although several recessive lethal genes have been  
198 detected that cause EA [25], their effects on the genetic variance of EA rate appears to be  
199 minimal. This is not surprising, considering that the lethal allele is always quite rare.  
200 Generation of homozygotes for rare alleles is generally due to inbreeding, but inbreeding is

201 carefully monitored in the Israeli dairy cattle population. The inbreeding from each potential  
202 mating is checked by the inseminator, and matings that result in >3.125% inbreeding are  
203 generally rejected [31].

204 Only 2 previous studies attempted to estimate heritability of EA in dairy cattle, and both  
205 are somewhat problematic. In Bamber et al. [32] pregnancy loss was determined by an initial  
206 pregnancy diagnosis 26 to 33 d after AI followed by determination of loss of that embryo at a  
207 subsequent diagnosis 14 to 39 d later, but only 3,775 cows were included in the study. Due to  
208 the relatively small sample, confidence intervals for the genetic parameters were so wide, as to  
209 render the results virtually meaningless. They found a heritability of 17%, which was not  
210 significantly different from the value of ~10% in the current study. However, they found that the  
211 service sire variance was 16% of the total variance. This is clearly at variance with the current  
212 study, and was also considered difficult to explain by [32]. In Carthy et al. [33] EA was assumed  
213 to have occurred if pregnancy was determined by ultrasound examination, and the embryo was  
214 later deemed to be unviable by a later examination. However, ultrasound examinations were  
215 performed at various time points postpartum at the discretion of the producer. On a sample of  
216 43,473 lactations they found heritability of only 2%, but repeatability of 66%. Part of the  
217 discrepancy to the current study may be due to the fact that the time periods for determination of  
218 both pregnancy and abortion were not consistent across records. Mean embryo loss was only  
219 8%, as compared to 22% on first parity in the current study.

220 The genetic trend for EA rate corresponds to changes in the Israeli breeding index, as  
221 noted previously. However, the phenotypic trend is not similar to the genetic trend. Several  
222 factors can possibly explain this, including climatic variation, and the fact that the phenotypic  
223 means were computed only for first parity cows.

224 The GWAS results show that the markers with the lowest probability values for EA are also  
225 included among the markers with the lowest probability values for CR, but not vice versa (Fig 5).  
226 In addition, the regression of the substitution effects of the significant EA markers on their  
227 substitution effects for CR is  $\sim 2$  (Fig 6). This suggests that the genetic factors that affect EA are  
228 likely a subgroup of factors affecting the CR. The markers that explain the most variance for EA  
229 suggest possible new insights on the polygenic architecture of this trait. For instance, by  
230 investigating the genomic area flanking these markers (Table 6), we found that the marker  
231 explaining the most variance (Table 6, Fig 7a) is located within the ABCA9 gene, that is found  
232 within an ABC genes cluster (Fig 7 a). The ATP-binding cassette (ABC) family are the major  
233 class of primary active transporters in the placenta. ABC proteins are reported to be important in  
234 efflux of xenobiotics and endogenous substrates like lipids, sterols and nucleotides. Recent  
235 studies provided evidence that ABC genes protect placental tissue by preventing accumulation of  
236 cytotoxic compounds, which is important in complicated pregnancies, such as in inflammatory or  
237 oxidative stress [34]. Thus, our finding of genetic variation within ABC genes cluster suggest  
238 that differences in EA predisposition might involve different sensitivity for oxidative stresses  
239 during the first trimester, mediated by ABC genes.

240 The significant marker on chromosome 21 is adjacent to the genes PAX9 and NKX2-1 (Fig  
241 7c). Previous works suggested that PAX9 is required for the chondrogenic differentiation of  
242 sclerotomal cells during embryogenesis [35, 36], and that NKX2 is required for the embryonic  
243 development of cholinergic septohippocampal projection neurons [37]. Moreover, according to  
244 PathCards, NKX2-1 is part of the embryo pre-implementation path [38]. The fact that this  
245 marker is associated with a major effect on EA suggests that altered predisposition for EA might  
246 be mediated by genes that regulating embryo development.

247 Since fertility is a major economical trait in dairy cattle [18], our results suggest that EA, as  
248 defined in this study, should be considered for inclusion in the commercial selection index.  
249 Shook [39] listed the criteria that a potential trait must meet in order to be included in the  
250 selection objective. First, it should have an economic value. Second, the trait must have  
251 sufficiently large genetic variation in relation to its economic value and heritability. Third, the  
252 trait should be measurable at a low cost and consistently recorded. An indicator trait may be  
253 favored if it has a high genetic correlation with the economically important trait, is easier to  
254 record, has a higher heritability than the economic trait, or can be measured earlier in life [40].  
255 The classic example of selection on an indicator trait in dairy cattle is somatic cell score as an  
256 indicator trait for mastitis [39]. The two traits have a relatively high genetic correlation, but  
257 somatic cell score has heritability of 10-20%, as opposed to 2-6% for clinical mastitis [39, 41].  
258 Selection on EA rate, as defined in the current analysis is even more attractive as an indicator  
259 trait for female fertility; in that there is no requirement to generate new data. Considering the  
260 apparent high genetic correlation, and the fact that the heritability for EA rate is three-fold the  
261 heritability for most measures of fertility, genetic progress for fertility will be higher via  
262 selection for EA rate.

263

## 264 **Materials and methods**

### 265 **Data sets analyzed**

266

267 Eight data sets were analyzed. A basic description of the data sets is given in Table 1,  
268 and the numbers of animals and levels of effects included in each data set are given in Table 2.

269 The first data set included conception status of first parity cows Israeli-Holstein cows with

270 calving dates from Jan. 1, 2007, through Dec. 31, 2016, and at least one insemination. Fertility  
271 data in Israel is unique in that cows that are not re-inseminated within 60 days are checked for  
272 pregnancy by a veterinarian [19]. The following records were deleted:

- 273 1. Cows that were daughters of foreign bulls.
- 274 2. Cows with first insemination by foreign bulls.
- 275 3. Cows with first insemination  $\leq 30$  and  $\geq 135$  days after parturition.
- 276 4. Cows for which pregnancy could not be determined for the first insemination. This  
277 chiefly included cows that were not re-inseminated, and were culled prior to  
278 determination of pregnancy by veterinary inspection.

279 The second data set was a subset of the first set, and included all cows that were either  
280 recorded as pregnant on the first insemination, and with pregnancy length  $\leq 290$  days; or cows  
281 that were recorded as “open” on the first insemination, and re-inseminated between 49 and 100  
282 days after the first insemination. The latter group was assumed to represent cows with EA.

283 The third data set included all cows in the first data set recorded as pregnant, and cows  
284 that were recorded as open and re-inseminated prior to 49 days after the first insemination. This  
285 data set was assumed to represent cows that either became pregnant or remained open after the  
286 first insemination. Although the objective was to eliminate cows with EA, the latter group of  
287 cows clearly include a small fraction of cows that aborted, and still displayed estrus prior to 49  
288 days after the first insemination.

289 Cows were included in the fourth data based on the same criteria as the second data set,  
290 but cows in second and third parities were also included. Since cows with second inseminations  
291  $< 49$  days or  $> 100$  days after first insemination were deleted for each parity, some cows had  
292 records on one, two or three parities, and for any specific parity a record could be included or

293 deleted. Variance components were computed for all four data sets for a binary trait. The  
294 analyses included all parents and grandparents of cows with valid records.

295 The fifth data set was similar to the fourth data set, except that it included all first through  
296 third parity cows with freshening dates from Jan. 1, 1985 through Dec. 31, 2016, which either  
297 became pregnant on first insemination or were re-inseminated between 49 and 100 days after the  
298 first insemination. This data set also included cows that were daughters of foreign bulls, and  
299 even bulls of breeds other than Holsteins, although these cows were only about 1% of all the  
300 cows. This data set was analyzed by the individual animal model in order to compute genetic  
301 evaluations for all bulls with genotypes for medium or high density SNP-chips. As in the  
302 previous data sets, the animal model analysis included all parents and grandparents of cows with  
303 valid records.

304 The sixth data set included all valid first through fifth parity records for female fertility  
305 with freshening dated from Jan 1 1985 through May 31, 2018. All cows that were inseminated at  
306 least once were included. As described previously [42], fertility was scored as the inverse of the  
307 number of inseminations to conception in percent. For cows that were culled prior to  
308 conception, the expect number of inseminations to conception was computed. As in data set 5,  
309 cows that were daughters of foreign Holstein bulls and bulls from breeds other than Holsteins  
310 were included, and the data set included all parent and grandparents of cows with valid records.  
311 This data set was analyzed by the multi-trait animal model, with each parity considered a  
312 separate trait, as described by [43]. The separate parity evaluations were combined into a multi-  
313 parity index, based on the economic value of each parity.

314 The seventh data set included all bulls with genetic evaluations from the analysis of the  
315 fifth data set with reliabilities  $> 50\%$  and genotypes for one of the medium or high density SNP-

316 chips. This data set was used to compute the GWAS analysis for frequency of EA. The final  
317 data set included all bulls with genetic evaluations from the sixth data set with reliabilities > 50%  
318 and genotypes. A GWAS analyses was also computed on this data set, and compared to the  
319 GWAS for EA rate.

320

## 321 **Statistical analyses**

322

323 Variance components were estimated for data sets one through four using the  
324 AIREMLf90 program [44]. The trait analyzed in data sets one and three was CR for the first  
325 insemination, and for data sets two and four the trait analyzed was EA rate, under the assumption  
326 that re-insemination between 49 and 100 days indicates an early abortion. Both traits were  
327 scored dichotomously, with non-conception or abortion scored as zero, and pregnancy scored as  
328 100. A single trait animal model was assumed for data sets one through three, and a multi-trait  
329 animal model was assumed for data set four. For data set four, the three parities were considered  
330 three separate traits. In addition to the random additive genetic effect of the cow calving, and  
331 service sire for the first insemination, all models included the effect of insemination month and  
332 herd-year-season as fixed effects. Two seasons were defined for each herd-year beginning in  
333 April and October of each year. For data sets one through four, two genetic groups were defined  
334 for animals with unlisted parents, one for males and one for females.

335 Heritability was defined as the ratio of the additive genetic variance to the sum of  
336 additive genetic, service sire and the random residual variances. Genetic and environmental  
337 correlations among the parities were computed for data set four. Genetic correlations were the  
338 correlations among the additive genetic effects, and the environmental correlations were the

339 correlations among the residual effects. The AIREMLf90 program also computes solutions for  
340 all effects included in the analysis model and standard errors for all variance components and the  
341 heritabilities and the correlations.

342 Data set five was analyzed by a single trait animal model with all three parities  
343 considered the same trait, as described by [42]. Thus the model included a random permanent  
344 environmental effect in addition to the additive genetic effect. These effects differ in their  
345 variance structure in that only the additive genetic effect included the relationship matrix. The  
346 assumed ratios of variance between the residual and the additive genetic and permanent  
347 environmental effects were both 9. Variances of abortion rate were lower in first and second  
348 parities, due to lower abortion rates. Therefore, first and second parity records were each  
349 multiplied by a factor greater than unity to obtain equal phenotypic variances for all three  
350 parities. The adjusted records were then adjusted for the mean effects of parity and insemination  
351 month by subtracting the means of the parity-insemination month classes from each record. In  
352 addition to the additive genetic and the permanent environmental effects, the model included the  
353 herd-year-season effect, as described previously; a parity-by herd type effect and a genetic group  
354 effect. Two herd-types were defined; “Moshav” (family farms) and “Kibbutz” (communal  
355 herds). Although the records were pre-adjusted for parity effects, a residual effect could remain  
356 after accounting for all the effects included in the model.

357 In the analysis of data set 5, 84 groups were defined based on the sex of the animal with  
358 unknown parents, which parent was unknown, and the birth year. In addition, separate groups  
359 were defined for sire of cows of breeds other than Holstein. Although only a very small fraction  
360 of the cows was sired by bulls of other breeds, these bulls were a significant fraction of the total  
361 number of bulls, and an even larger fraction of the bulls with unknown parents.



362           The overall genetic trend was computed as the regression of the cows' breeding values on  
363 their birth dates, for all cows born since Jan. 1, 1983. Yearly means of first parity non-abortion  
364 rate and the breeding values of cows by birth year, relative to cows born in 2010, were  
365 computed. Reliabilities of the breeding values of all animals included in the analysis were  
366 estimated by the method of [45]. There were 1701 sires with reliabilities  $> 0.5$  for EA rate.  
367 Correlations were computed between the breeding values for EA rate for these sires and the  
368 current Israel breeding index, PD16 and 11 economic traits analyzed in Israel. Breeding values  
369 for these traits other than female fertility were computed as described previously [43, 46-48].

370

### 371 **Genome-wide association studies**

372

373           A total of 1749 Israeli Holstein bulls were genotyped. Since genotyping of these sires  
374 were performed using several SNP-chip platforms, we filtered-in only those markers that were  
375 covered in more than 90% of the tested cohort. Approximately 41,000 SNPs were retained.  
376 Genome-wide associations were computed for the sires' transmitting abilities ( $\frac{1}{2}$  of the breeding  
377 value) for EA rate and CR (Table 1 and 2, data sets 6 and 7). Of the genotyped bulls, there were  
378 1179 and 1297 with genetic evaluations for EA rate and CR, with reliabilities  $> 50\%$ ,  
379 respectively. The additive substitution effects, the coefficients of determination ( $R^2$ ) and the  
380 nominal probabilities for the hypothesis of no effect were computed by using plink software  
381 [49]. Genome-wide probabilities were estimated by generating one million permutations of  
382 genotype data against the genetic evaluations. Thus, the minimal genome-wide probability was  
383  $< 10^{-6}$  if the substitution effect obtained from the actual data was greater than all of the  
384 permutation effects.

385

## 386 **Acknowledgments**

387

388           This research was supported by grant number 58-8042-5-063F from the U.S.-Israel  
389 Binational Agricultural Research and Development (BARD) Fund, and by a grant from the Israel  
390 Dairy Board. We thank Ignacy Misztal and Shogo Tsuruta for use of the AIREMLF90 program,  
391 and Michael van Straten for useful discussions.

392

## 393 **References**

394

- 395       1. Agarwal A, Mulgund A, Hamada A, Chyatte MR. A unique view on male infertility  
396           around the globe. *Reprod Biol Endocrinol.* 2015; 13:37.
- 397       2. de Kretser DM. Male infertility. *Lancet.* 1997; 349: 787-90
- 398       3. Gershoni M, Pietrokovski S. Reduced selection and accumulation of deleterious  
399           mutations in genes exclusively expressed in men. *Nat Commun.* 2014; 5: 4438.
- 400       4. Gershoni M, Pietrokovski S. The landscape of sex-differential transcriptome and its  
401           consequent selection in human adults. *BMC Biol.* 2017;15: 7.
- 402       5. Poppe K, Velkeniers B. Female infertility and the thyroid. *Best Pract Res Clin Endocrinol*  
403           *Metab.* 2004; 18: 153-165.
- 404       6. Henry L. French statistical research in natural fertility. *Public health and population*  
405           *change: current research issues.* Pittsburgh, Pa. University of Pittsburgh Press. 1966; 333-  
406           350.

- 407 7. Sheps MC. An analysis of reproductive patterns in an American isolate. *Popul Stud (NY)*  
408 1965; 21: 65.
- 409 8. Edmonds DK, Lindsay KS, Miller JF, Williamson E, Wood PJ. Early embryonic  
410 mortality in women. *Fertil Steril*. 1982; 38: 447-453.
- 411 9. Wilcox AJ, Weinberg CR, O'connor JF, Baird DD, Schlatterer JP, Canfield RE, Nisula  
412 BC. Incidence of early loss of pregnancy. *N Engl J Med*. 1988; 319: 189-194.
- 413 10. Evans AC. Characteristics of ovarian follicle development in domestic animals. *Reprod*  
414 *Domest Anim*. 2003; 38: 240–246.
- 415 11. Yapura J, Mapletoft RJ, Pierson R, Singh J, Naile J, Giesy JP, Adams GP. A bovine  
416 model for examining the effects of an aromatase inhibitor on ovarian function in women.  
417 *Fertil Steril*. 2011; 96: 434–438. e433.
- 418 12. Malhi PS, Adams GP, Singh J. Bovine model for the study of reproductive aging in  
419 women: follicular, luteal, and endocrine characteristics. *Biol Reprod*. 2005; 73: 45–53.
- 420 13. Bauersachs S, Mitko K, Ulbrich SE, Blum H, Wolf E. Transcriptome studies of bovine  
421 endometrium reveal molecular profiles characteristic for specific stages of estrous cycle  
422 and early pregnancy. *Exp Clin Endocrinol Diabetes*. 2008;116: 371–384.
- 423 14. Ostrup E, Hyttel P, Ostrup O, Embryo-maternal communication. signaling before and  
424 during placentation in cattle and pig. *Reprod Fertil Dev*. 2011; 23: 964–975.
- 425 15. Bauersachs S, Ulbrich SE, Zakhartchenko V, Minten M, Reichenbach M, Reichenbach  
426 HD, Blum H, Spencer TE, Wolf E. The endometrium responds differently to cloned  
427 versus fertilized embryos. *Proc Natl Acad Sci USA*. 2009; 106: 5681–5686.
- 428 16. Mansouri-Attia N, Sandra O, Aubert J, Degrelle S, Everts RE, Giraud-Delville C,  
429 Heyman Y, Galio L, Hue I, Yang X, Tian XC, Lewin HA, Renard JP. Endometrium as an

- 430 early sensor of in vitro embryo manipulation technologies. *Proc Natl Acad Sci USA*.  
431 2009; 106: 5687–5692.
- 432 17. Weller JI, Ron M. Genetic analysis of fertility traits in Israeli Holsteins by linear and  
433 threshold models. *J Dairy Sci*. 1992; 75: 2541-2548.
- 434 18. Fleming A, Baes CF, Martin AAA, Chud TCS, Malchiodi F, Brito LF, Miglior F.  
435 Symposium review: The choice and collection of new relevant phenotypes for fertility  
436 selection. *J Dairy Sci*. 2019; 102:1–13.
- 437 19. Weller JI. Genetic analysis of fertility traits in the Israeli dairy cattle population. *J Dairy*  
438 *Sci*. 1989; 72: 2644-2650.
- 439 20. VanRaden PM, Sanders AH, Tooker ME, Miller RH, Norman HD, Kuhn MT, Wiggans  
440 GR. Development of a national genetic evaluation for cow fertility. *J Dairy Sci*. 2004;  
441 87:2285–2292.
- 442 21. Santos, J. E. P., Thatcher, W. W., Chebel, R. C., Cerri, R. L. A., & Galvao, K. N. The  
443 effect of embryonic death rates in cattle on the efficacy of estrus synchronization  
444 programs. *Anim Reprod Sci*. 2004; 82: 513–535.
- 445 22. Moore DA, Overton MW, Chebel RC, Truscott ML, BonDurant RH. Evaluation of  
446 factors that affect embryonic loss in dairy cattle. *J Am Vet Med Assoc*. 2005; 226: 1112-  
447 1118.
- 448 23. Drost M, Ambrose JD, Thatcher MJ, Cantrell CK, Wolfsdorf KE, Hasler JF, Thatcher  
449 WW. Conception rates after artificial insemination or embryo transfer in lactating dairy  
450 cows during summer in Florida. *Theriogenology*. 1999; 52: 1161-1167.

- 451 24. Sartori R, Gümen A, Guenther JN, Souza AH, Caraviello DZ, Wiltbank MC. Comparison  
452 of artificial insemination versus embryo transfer in lactating dairy cows. *Theriogenology*.  
453 2006; 65: 1311-1321.
- 454 25. Cole JB, Null DJ, VanRaden PM. Phenotypic and genetic effects of recessive haplotypes  
455 on yield, longevity, and fertility. *J Dairy Sci*. 2016; 99: 7274–7288.
- 456 26. Schütz E, Wehrhahn C, Wanjek M, Bortfeld R, Wemheuer WE, Beck J, et al. The  
457 Holstein Friesian lethal haplotype 5 (HH5) results from a complete deletion of TBF1M  
458 and cholesterol deficiency (CDH) from an ERV-(LTR) insertion into the coding region of  
459 APOB. *Plos One*. 2016; e0154602.
- 460 27. Remnant JG, Green MJ, Huxley JN, Hudson CD. Associations between dairy cow inter-  
461 service interval and probability of conception. *Theriogenology*. 2018; 114: 324-329
- 462 28. Greenham T, Oikonomou G, Grove-White DH. A description of interestrus and  
463 interservice intervals and associated fertility in 16 United Kingdom dairy herds. *J Dairy*  
464 *Sci*. 2019; 102: 824-832.
- 465 29. Markette KL, Seidel JR GE, Elsdén RP. Estimation of embryonic losses in bovine  
466 embryo transfer recipients from progesterone profiles and returns to estrus.  
467 *Theriogenology*. 1985; 23.1: 45-62.
- 468 30. Weller JI, Bickhart DM, Wiggans GR, Tooker ME, O’Connell JR, Jiang J, Ron M,  
469 VanRaden PM. Determination of quantitative trait nucleotides by concordance analysis  
470 between quantitative trait loci and marker genotypes of US Holsteins. *J Dairy Sci*. 2018;  
471 101: 9089-9107.
- 472 31. Weller JI, Ezra E. Analysis of inbreeding in the Israeli Holstein dairy cattle population.  
473 *Proc. 2005 Interbull meeting, Uppsala, Sweden, June 2-4, pp. 85-87.*

- 474 32. Bamber RL, Shook GE, Wiltbank MC, Santos JEP, Fricke PM, Genetic parameters for  
475 anovulation and pregnancy loss in dairy cattle. *J Dairy Sci.* 2009; 92: 5739–5753.
- 476 33. Carthy TR, Ryan DP, Fitzgerald AM, Evans RD, Berry DP. Genetic parameters of  
477 ovarian and uterine reproductive traits in dairy cows. *J Dairy Sci.* 2015; 98: 4095–4106.
- 478 34. Aye IL, Keelan JA. Placental ABC transporters, cellular toxicity and stress in pregnancy.  
479 *Chem Biol Interact.* 2013; 203: 456-466.
- 480 35. Rodrigo I, Hill RE, Balling R, Münsterberg A, Imai K. Pax1 and Pax9 activate Bapx1 to  
481 induce chondrogenic differentiation in the sclerotome. *Development.* 2003; 130: 473-482.
- 482 36. Müller TS, Ebensperger C, Neubüser A, Koseki H, Balling R, Christ B, Wilting J.  
483 Expression of avian pax1 and pax9 is intrinsically regulated in the pharyngeal endoderm,  
484 but depends on environmental influences in the paraxial mesoderm. *Dev Biol.* 1996; 178:  
485 403-417.
- 486 37. Magno L, Barry C, Schmidt-Hieber C, Theodotou P, Häusser M, Kessaris N. NKX2-1 is  
487 required in the embryonic septum for cholinergic system development, learning, and  
488 memory. *Cell reports.* 2017; 20: 1572-1584.
- 489 38. Belinky F, Nativ N, Stelzer G, Zimmerman S, Iny Stein T, Safran M, Lancet D.  
490 PathCards: multi-source consolidation of human biological pathways. Database, 2015;  
491 [doi.org/10.1093/database/bav006](https://doi.org/10.1093/database/bav006).
- 492 39. Shook GE. Selection for disease resistance. *J Dairy Sci.* 1989; 72: 1349–1362.
- 493 40. Miglior, F, Fleming A, Malchiodi F, Brito LF, Martin P, Baes CF. A 100-Year Review:  
494 Identification and genetic selection of economically important traits in dairy cattle. *J*  
495 *Dairy Sci.* 2017; 100: 10251–10271.

- 496 41. Shook GE. Major advances in determining appropriate selection goals. *J Dairy Sci.* 2006;  
497 89: 1349–1361.
- 498 42. Weller JI, Ezra E. Genetic analysis of somatic cell concentration and female fertility of  
499 Israeli Holsteins by the individual animal model. *J Dairy Sci.* 1997; 80: 586-593.
- 500 43. Weller JI, Ezra E. Genetic analysis of the Israeli Holstein dairy cattle population for  
501 production and non-production traits with a multitrait animal model. *J Dairy Sci.* 2004;  
502 87: 1519-1527.
- 503 44. Misztal I, Tsuruta S, Lourenco D, Aguilar I, Legarra A, Vitezica Z. Manual for BLUPF90  
504 family of programs. University of Georgia, Athens, USA. 2014.  
505 ([http://nce.ads.uga.edu/wiki/lib/exe/fetch.php?media=blupf90\\_all2.pdf](http://nce.ads.uga.edu/wiki/lib/exe/fetch.php?media=blupf90_all2.pdf))
- 506 45. Misztal I, Wiggans GR. Approximation of prediction error variance in large-scale animal  
507 models. *J Dairy. Sci* 1988; 71(Suppl. 2): 27-32.
- 508 46. Settar P, Weller JI. Genetic analysis of cow survival in the Israeli dairy cattle population.  
509 *J Dairy Sci.* 1999; 82: 2170-2177.
- 510 47. Weller JI, Ezra E. Genetic analysis of calving traits by the multi-trait individual animal  
511 model. *J Dairy Sci.* 2016; 99: 427–442.
- 512 48. Weller JI, Ezra E, Leitner G. Genetic analysis of persistency in the Israeli Holstein  
513 population by the multitrait animal model. *J Dairy Sci.* 2006; 89: 2738-2746.
- 514 49. Purcell S, et al. PLINK: a tool set for whole-genome association and population-based  
515 linkage analyses. *Am J Hum Genet.* 2007; 81: 559-575.

516

517 **Table 1. Basic description of the seven data sets analyzed.**

| Data Set | Description                       | Analysis Type <sup>a</sup> | Parities | Freshening years included |      |
|----------|-----------------------------------|----------------------------|----------|---------------------------|------|
|          |                                   |                            |          | Beginning                 | End  |
| 1        | Conception rate, all cows         | VC                         | 1        | 2007                      | 2016 |
| 2        | Non-abortion rate                 | VC                         | 1        | 2007                      | 2016 |
| 3        | Conception rate without abortions | VC                         | 1        | 2007                      | 2016 |
| 4        | Non-abortion rate                 | VC                         | 1-3      | 2007                      | 2016 |
| 5        | Non-abortion rate                 | SAM                        | 1-3      | 1985                      | 2016 |
| 6        | Female fertility                  | MAM                        | 1-5      | 1985                      | 2018 |
| 7        | Non-abortion rate, GWAS           | GWAS                       | 1-3      | 1985                      | 2016 |
| 8        | Female fertility, GWAS            | GWAS                       | 1-3      | 1985                      | 2016 |

518

519 <sup>a</sup> VC = variance component analysis, SAM = single trait animal model, MAM = multi-trait

520 animal model, GWAS = genome-wide association study.

521



522 **Table 2. Number of animals with records, ancestors and levels of effects in the analysis**  
523 **models.**

| Data Set | Number of levels or animals |              |                   |                |                      |           |
|----------|-----------------------------|--------------|-------------------|----------------|----------------------|-----------|
|          | Insemination month          | Service sire | Herd-year-seasons | Genetic groups | Animals with records | Ancestors |
| 1        | 12                          | 569          | 13699             | 2              | 260782               | 142297    |
| 2        | 12                          | 554          | 12802             | 2              | 118039               | 123600    |
| 3        | 12                          | 568          | 13552             | 2              | 233037               | 142816    |
| 4        | -                           | -            | 13551             | 2              | 182758               | 136187    |
|          | 12                          | 554          | -                 | -              | 118039               | -         |
|          | 12                          | 542          | -                 | -              | 77193                | -         |
|          | 12                          | 431          | -                 | -              | 51234                | -         |
| 5        | -                           | -            | 48757             | 84             | 571988               | 181478    |
| 6        | -                           | -            | 50536             | 80             | 861939               | 143649    |
| 7        | -                           | -            | -                 | -              | 1179                 | -         |
| 8        | -                           | -            | -                 | -              | 1297                 | -         |

524

525 Data sets are defined in Table 1.

526

527 **Table 3. Variance components ( $\pm$ standard errors) and heritabilities for data sets 1-4.**

| Data set | Parity | Frequency of abortion/<br>conception (%) | Variance components |                |                   | Heritability      |
|----------|--------|------------------------------------------|---------------------|----------------|-------------------|-------------------|
|          |        |                                          | Additive genetic    | Service sire   | Residual          |                   |
| 1        | 1      | 40.2                                     | 69.2 $\pm$ 6.8      | 8.6 $\pm$ 0.9  | 2207.4 $\pm$ 7.9  | 0.030 $\pm$ 0.003 |
| 2        | 1      | 21.7                                     | 119.7 $\pm$ 11.1    | 2.8 $\pm$ 0.7  | 1426.3 $\pm$ 10.1 | 0.077 $\pm$ 0.007 |
| 3        | 1      | 55.2                                     | 60.9 $\pm$ 6.7      | 10.1 $\pm$ 1.1 | 2273.5 $\pm$ 8.4  | 0.026 $\pm$ 0.003 |
| 4        | 1      | 21.7                                     | 138.0 $\pm$ 10.2    | 2.9 $\pm$ 0.7  | 1414.4 $\pm$ 9.5  | 0.089 $\pm$ 0.006 |
|          | 2      | 29.6                                     | 201.2 $\pm$ 15.6    | 3.5 $\pm$ 1.0  | 1735.1 $\pm$ 14.8 | 0.104 $\pm$ 0.008 |
|          | 3      | 31.0                                     | 188.6 $\pm$ 18.6    | 3.5 $\pm$ 1.5  | 1818.8 $\pm$ 18.7 | 0.094 $\pm$ 0.009 |

528 Heritability was estimated as the additive genetic variance component divided by the sum of all  
529 three variance components.

530

531 **Table 4. Genetic and environmental correlations  $\pm$  standard errors for abortion rate (data**  
532 **set 4).**

| Parities | Correlations      |                   |
|----------|-------------------|-------------------|
|          | Genetic           | Environmental     |
| 1, 2     | 0.966 $\pm$ 0.012 | 0.096 $\pm$ 0.008 |
| 1, 3     | 0.905 $\pm$ 0.028 | 0.066 $\pm$ 0.010 |
| 2, 3     | 0.963 $\pm$ 0.017 | 0.116 $\pm$ 0.010 |

533 Genetic correlations were the correlations among the additive genetic effects, and the  
534 environmental correlations were the correlations among the residual effects.

535 **Table 5. Correlations between breeding values for non-abortion rate from data set 5 and**  
 536 **the Israeli breeding index (PD16) and the other economic traits computed for Israeli**  
 537 **Holsteins.**

| Traits                                | % of index | Number of bulls | Correlation |
|---------------------------------------|------------|-----------------|-------------|
| PD16                                  | 100        | 1693            | 0.115***    |
| Milk (kg)                             | 0.00       | 1693            | -0.077**    |
| Fat (kg)                              | 21.20      | 1693            | -0.026      |
| Protein (kg)                          | 37.32      | 1693            | -0.044      |
| SCS <sup>1</sup>                      | 10.98      | 1693            | -0.196***   |
| Female fertility (%)                  | 14.38      | 1693            | 0.749***    |
| Herd-life (days)                      | 9.58       | 1693            | 0.296***    |
| Persistency (%)                       | 4.24       | 1693            | 0.078**     |
| Dystocia, maternal (%) <sup>a</sup>   | 1.27       | 1693            | -0.179***   |
| Stillbirth, maternal (%) <sup>a</sup> | 1.03       | 1693            | -0.246***   |
| Dystocia, direct (%) <sup>1</sup>     | 0.00       | 1592            | -0.105***   |
| Stillbirth, direct (%) <sup>1</sup>   | 0.00       | 1592            | -0.112***   |

538 The relative contribution of each to the index and the numbers of bulls with evaluations with  
 539 reliabilities > 0.5 for each trait are also listed.

540 <sup>a</sup> Negative values are economically favorable.

541 \* significant, p<0.05; \*\*, significant, p<0.01, \*\*\*, significant, p<0.001.

542 **Table 6. Markers with the lowest probability values for early abortion rate.**

| Location |            | SNP                    | Early abortion rate |                 |                | Conception rate |                |          |
|----------|------------|------------------------|---------------------|-----------------|----------------|-----------------|----------------|----------|
| Chr.     | Base pairs |                        | Beta <sup>a</sup>   | R <sup>2b</sup> | P <sup>c</sup> | Beta            | R <sup>2</sup> | P        |
| 19       | 61503930   | Hapmap43271-BTA-46356  | 1.56                | 0.051           | 4.96E-15       | 0.89            | 0.058          | 1.30E-18 |
| 8        | 24608595   | Hapmap41408-BTA-103152 | 1.52                | 0.047           | 6.08E-14       | 0.83            | 0.048          | 1.34E-15 |
| 17       | 26712567   | BTA-46662-no-rs        | -1.95               | 0.047           | 6.60E-14       | -1.02           | 0.045          | 1.19E-14 |
| 21       | 46984914   | BTA-52458-no-rs        | 1.49                | 0.047           | 6.63E-14       | 0.60            | 0.026          | 4.51E-09 |
| 17       | 26735031   | Hapmap41875-BTA-46663  | -2.23               | 0.045           | 1.81E-13       | -1.26           | 0.050          | 3.43E-16 |
| 24       | 53790841   | BTA-58638-no-rs        | 1.77                | 0.043           | 4.99E-13       | 0.84            | 0.035          | 1.47E-11 |
| 7        | 22920391   | BTB-01966013           | 1.49                | 0.042           | 1.01E-12       | 0.68            | 0.031          | 2.07E-10 |
| 7        | 22996615   | BTB-01398686           | 1.47                | 0.041           | 1.95E-12       | 0.66            | 0.029          | 6.26E-10 |

543 Markers are sorted in descending order of the probability to reject the null hypothesis of no effect  
544 on early abortion rate. The substitution effects and coefficients of determination are given for  
545 each marker for early abortion and conception rate.

546 <sup>a</sup>The allele substitution effects in transmitting value trait units.

547 <sup>b</sup>Coefficient of determination.

548 <sup>c</sup>The nominal probability for the hypothesis of no effect. All genome-wide probabilities were  
549  $<10^{-6}$ .

550 **Figure captions**

551

552 **Fig 1. Frequencies of days between first and second inseminations for first parity Israeli**

553 **Holstein cows.** Valid records of cows freshening between 2007 and 2016 are included.

554

555 **Fig 2. Effects of insemination month on conception and abortion rate.** Based on valid

556 records of cows freshening between 2007 and 2016. , Conception rate; , early

557 abortion rate. A score of 0 = non-conception or abortion, and 100 = normal pregnancy. Effects

558 are computed relative to December.

559

560 **Fig 3. Mean breeding values of non-abortion rate and mean non-abortion rate of first**

561 **parity cows by birth year.** , Mean breeding value for non-abortion rate; , Mean

562 non-abortion rate. A score of 0 = abortion, and 100 = normal pregnancy. Genetic evaluations

563 are computed relative to cows with born in 2010.

564

565 **Fig 4. GWAS Manhattan plot for EA rate.** Dots represent each marker. Chromosomal

566 positions are on the X-axis, and nominal  $-\log_{10}$  P-values are on the Y-axis. The blue line

567 denotes the genome-wide significance threshold of 0.05, as derived from one million data

568 permutations and correction for multiple testing.

569

570 **Fig 5. Comparison between the GWAS results for early abortion rate and conception rate.**

571 a) The 30 markers with the lowest nominal probabilities for early abortion rate as a function of

572 the corresponding probabilities of these markers for conception rate. b) The 30 markers with the

573 lowest nominal probabilities for conception rate as a function of the corresponding probabilities  
574 of these markers for early abortion rate. The red dashed line denotes the genome-wide  
575 significance threshold of 0.05 for early abortion as derived from one million data permutations  
576 and after correction for multiple testing.

577

578 **Fig 6.** The substitution effects for early abortion rate of the 30 markers with the lowest nominal  
579 probabilities as a function of the substitution effects for the same markers for conception rate.

580

581 **Fig 7.** Schematic representation of the genomic area flanking four of the markers with the lowest  
582 nominal probability values (Table 6). The arrows represent the genes position and the strand  
583 orientation. The red asterisk represents the marker positions for a) Hapmap43271-BTA-46356  
584 located on chromosome 19 b) Hapmap41408-BTA-103152 located on chromosome 8 c) BTA-  
585 52458-no-rs located on chromosome 21 and d) BTA-58638-no-rs located on chromosome 21.

586

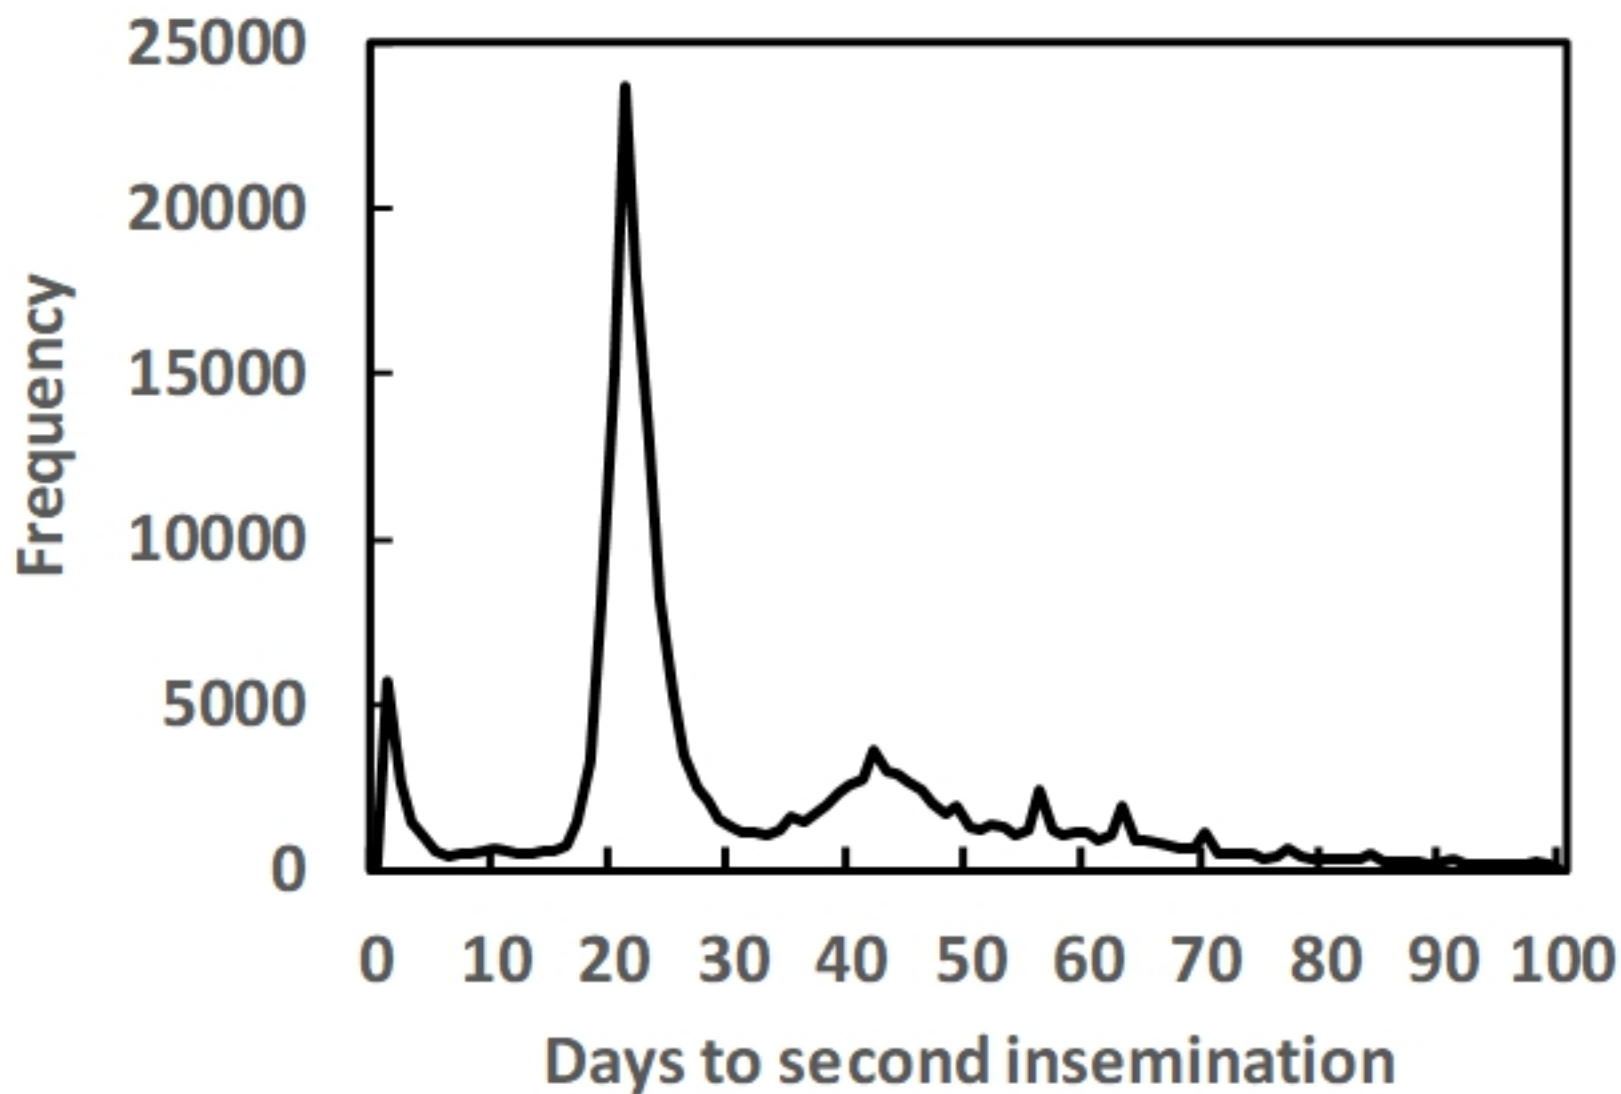

Figure 1

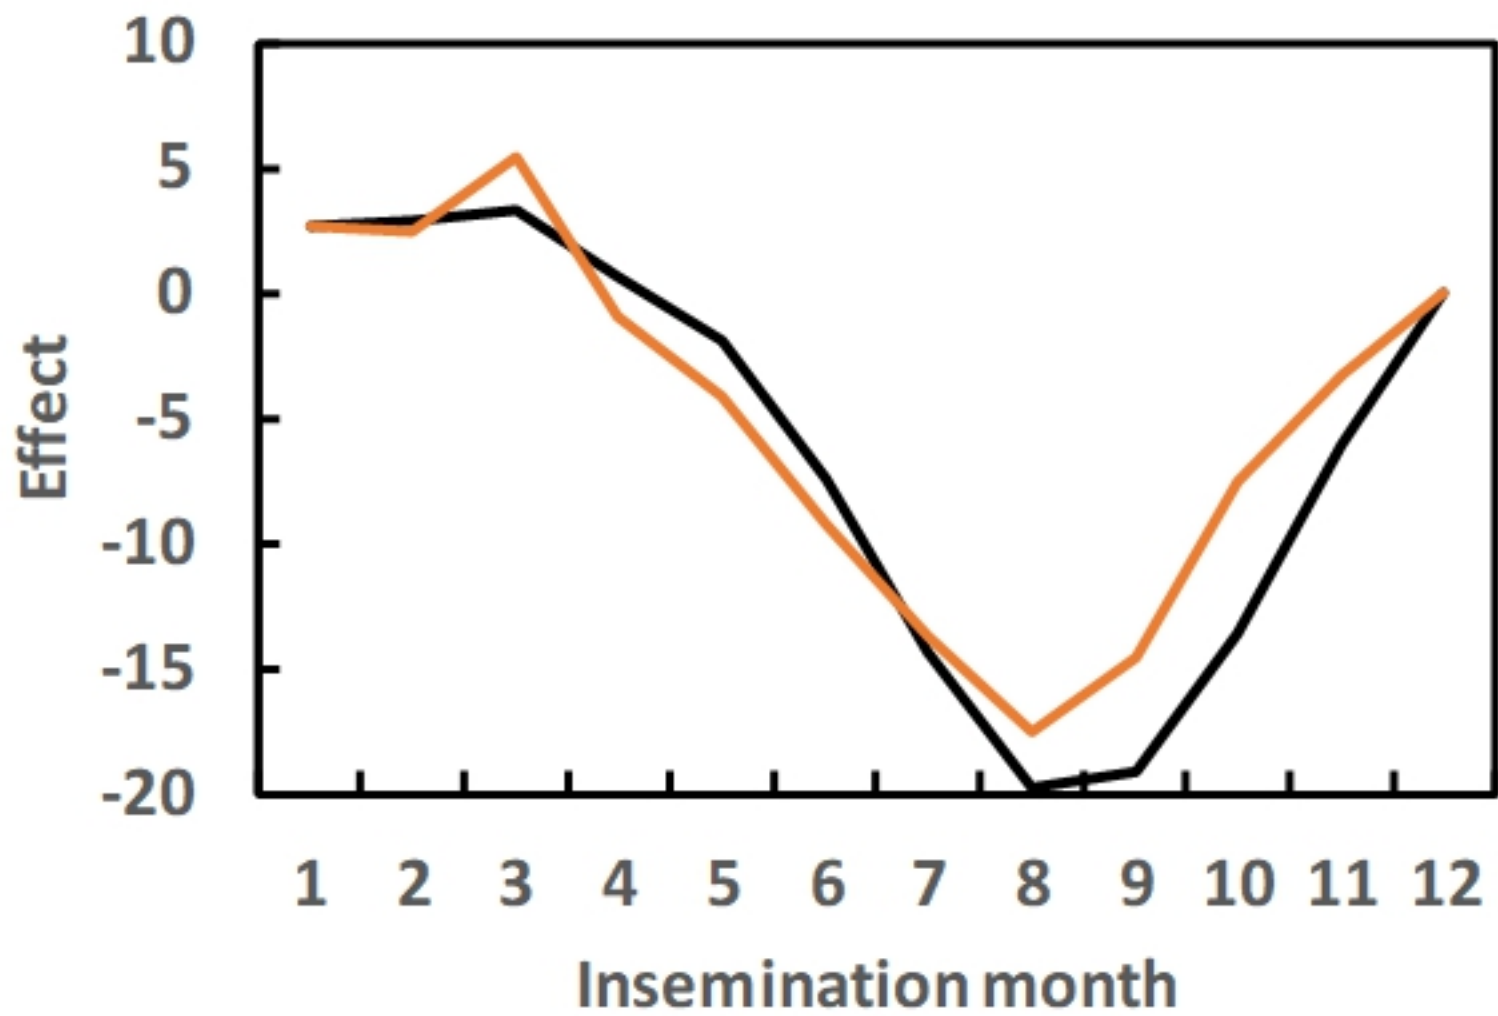

Figure 2



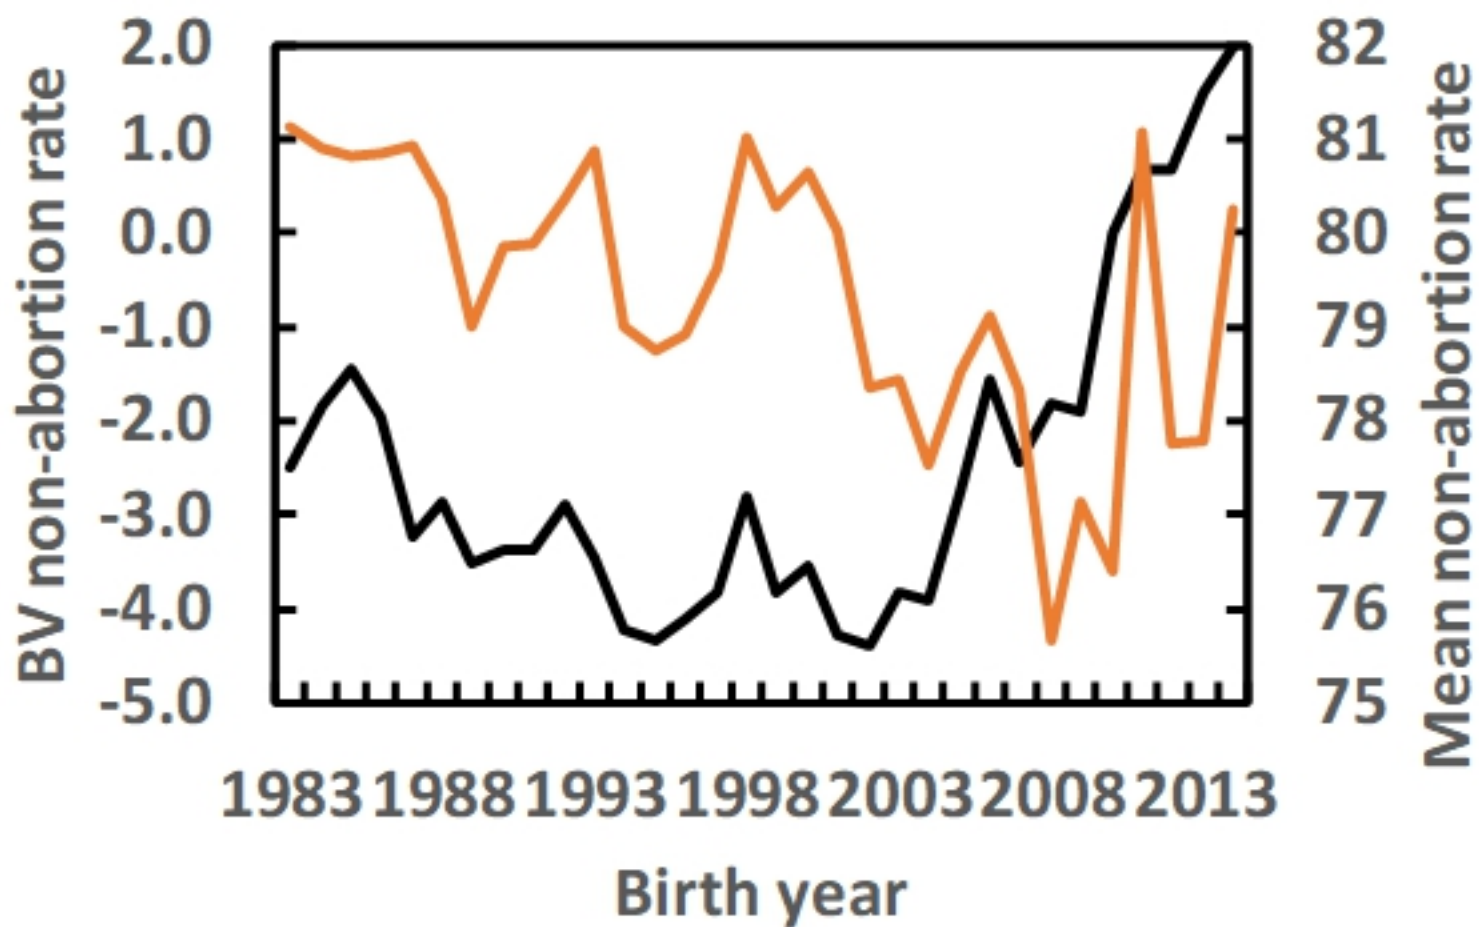

Figure 3

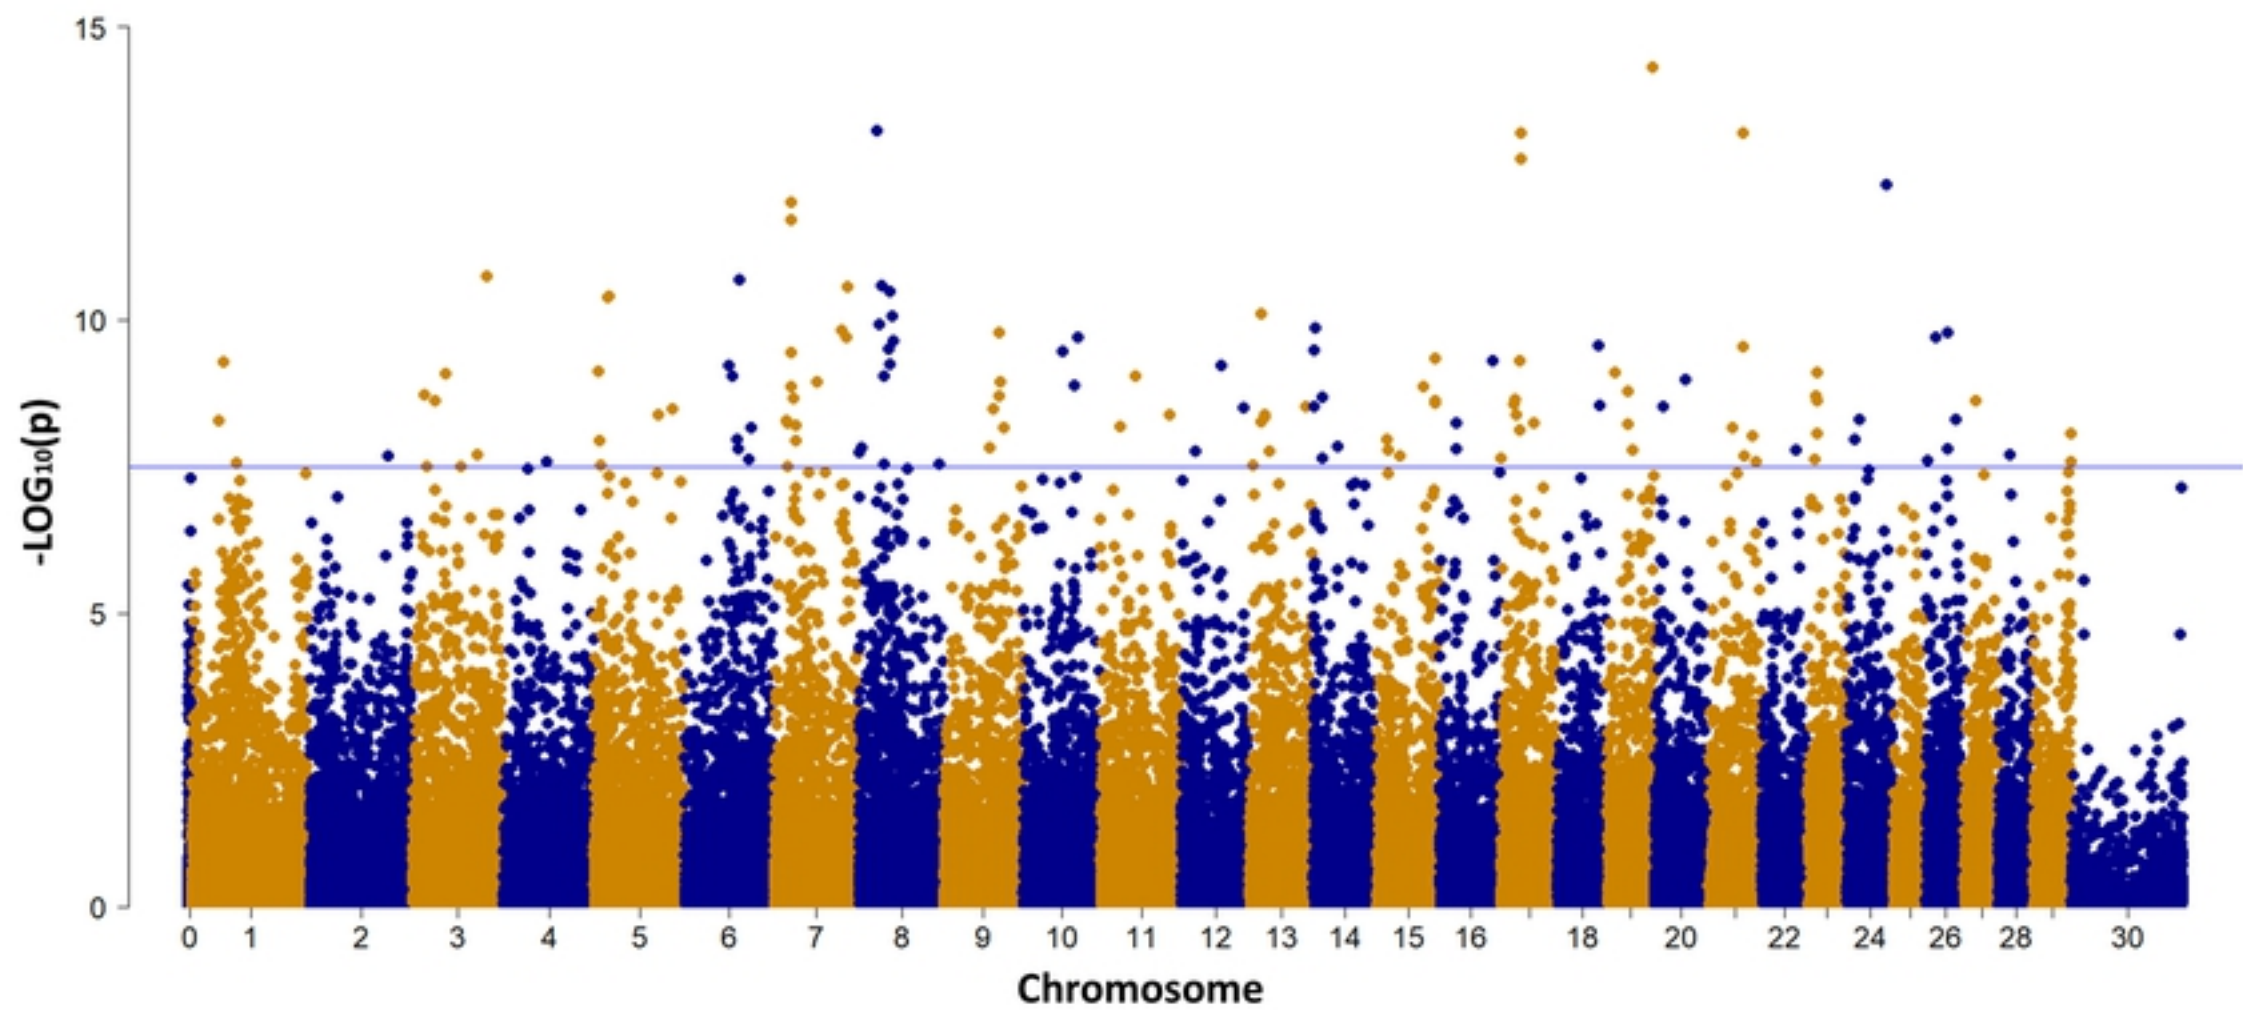

Figure 4

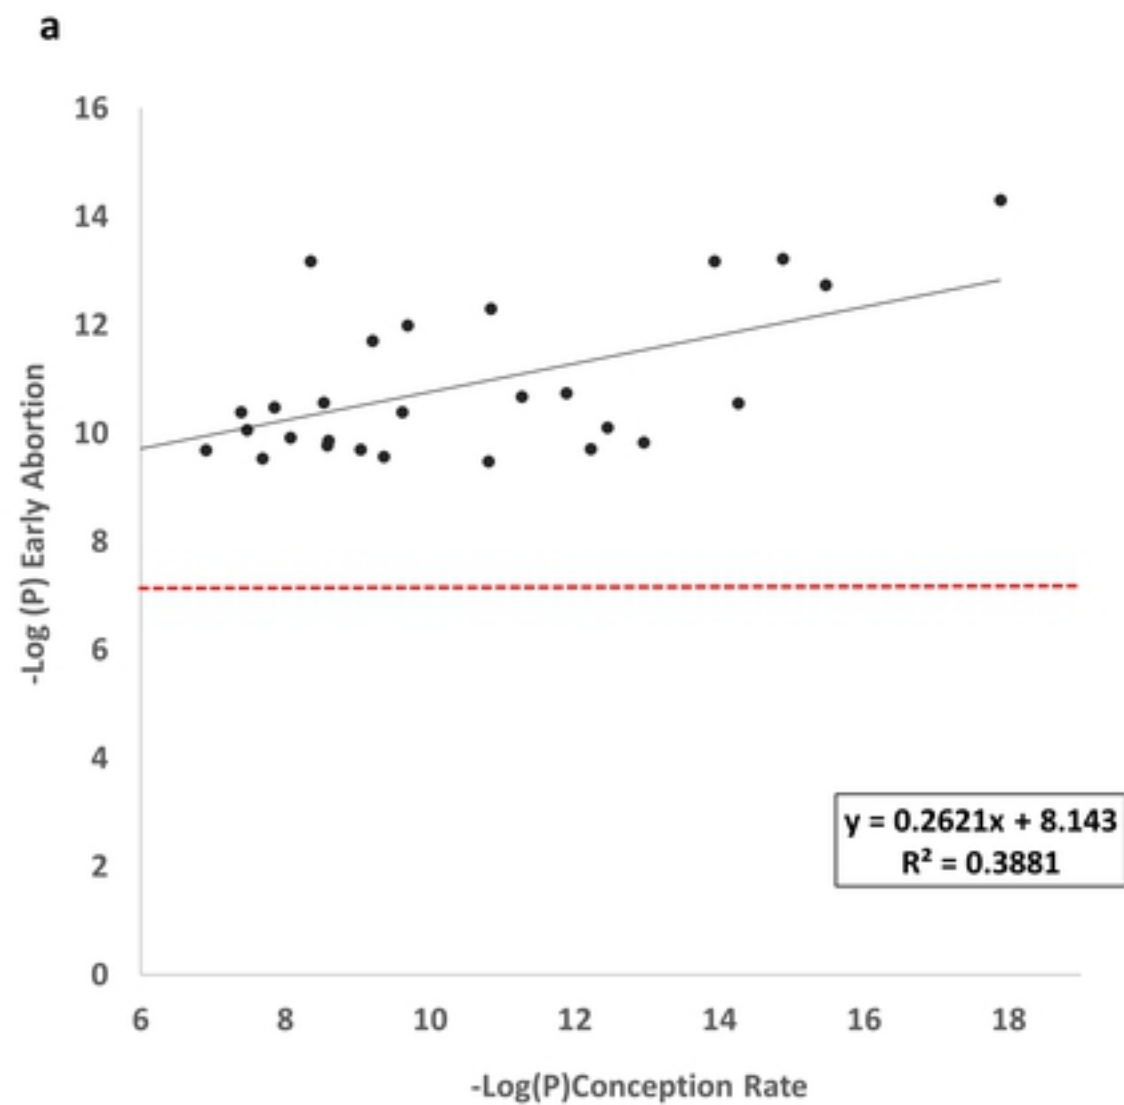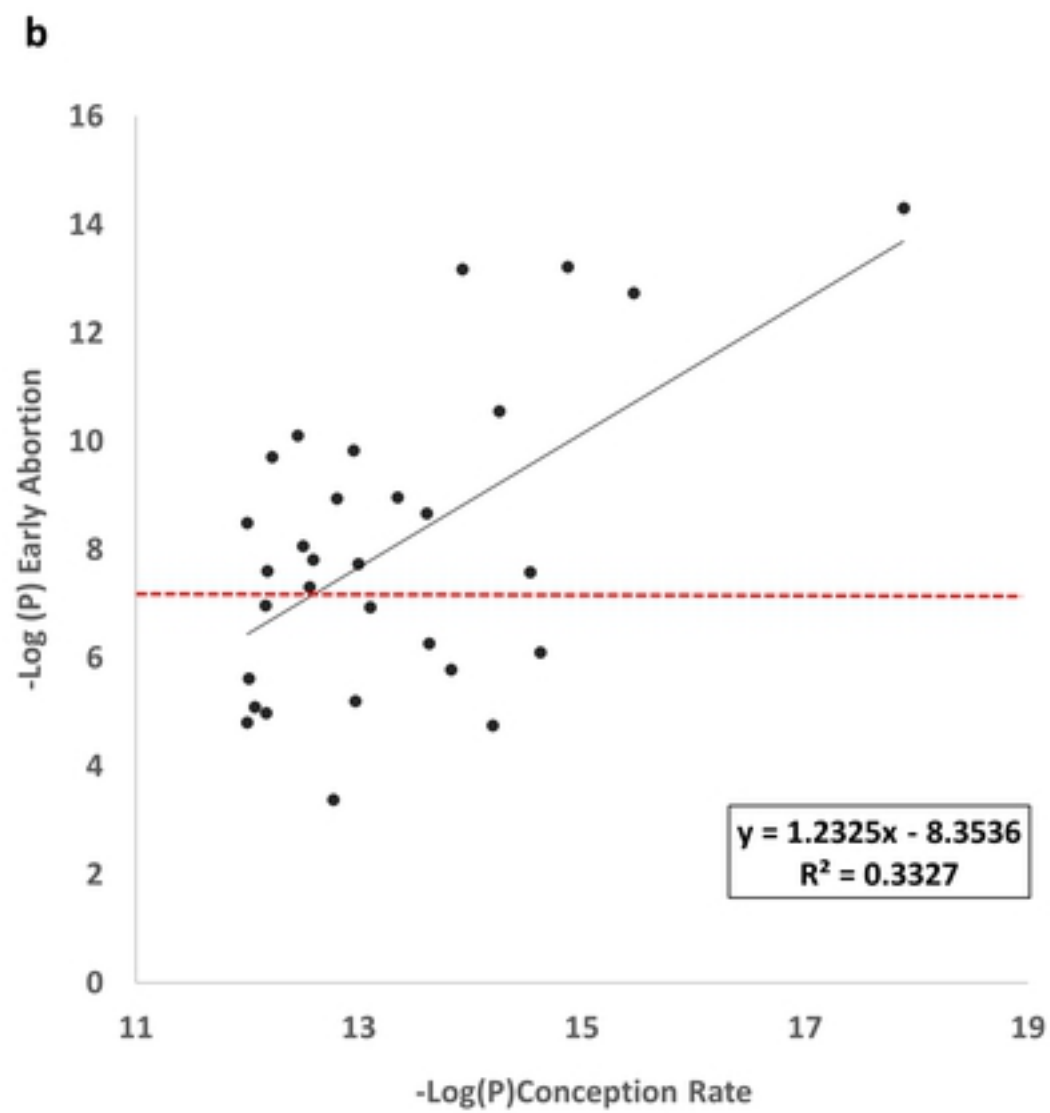

Figure 5

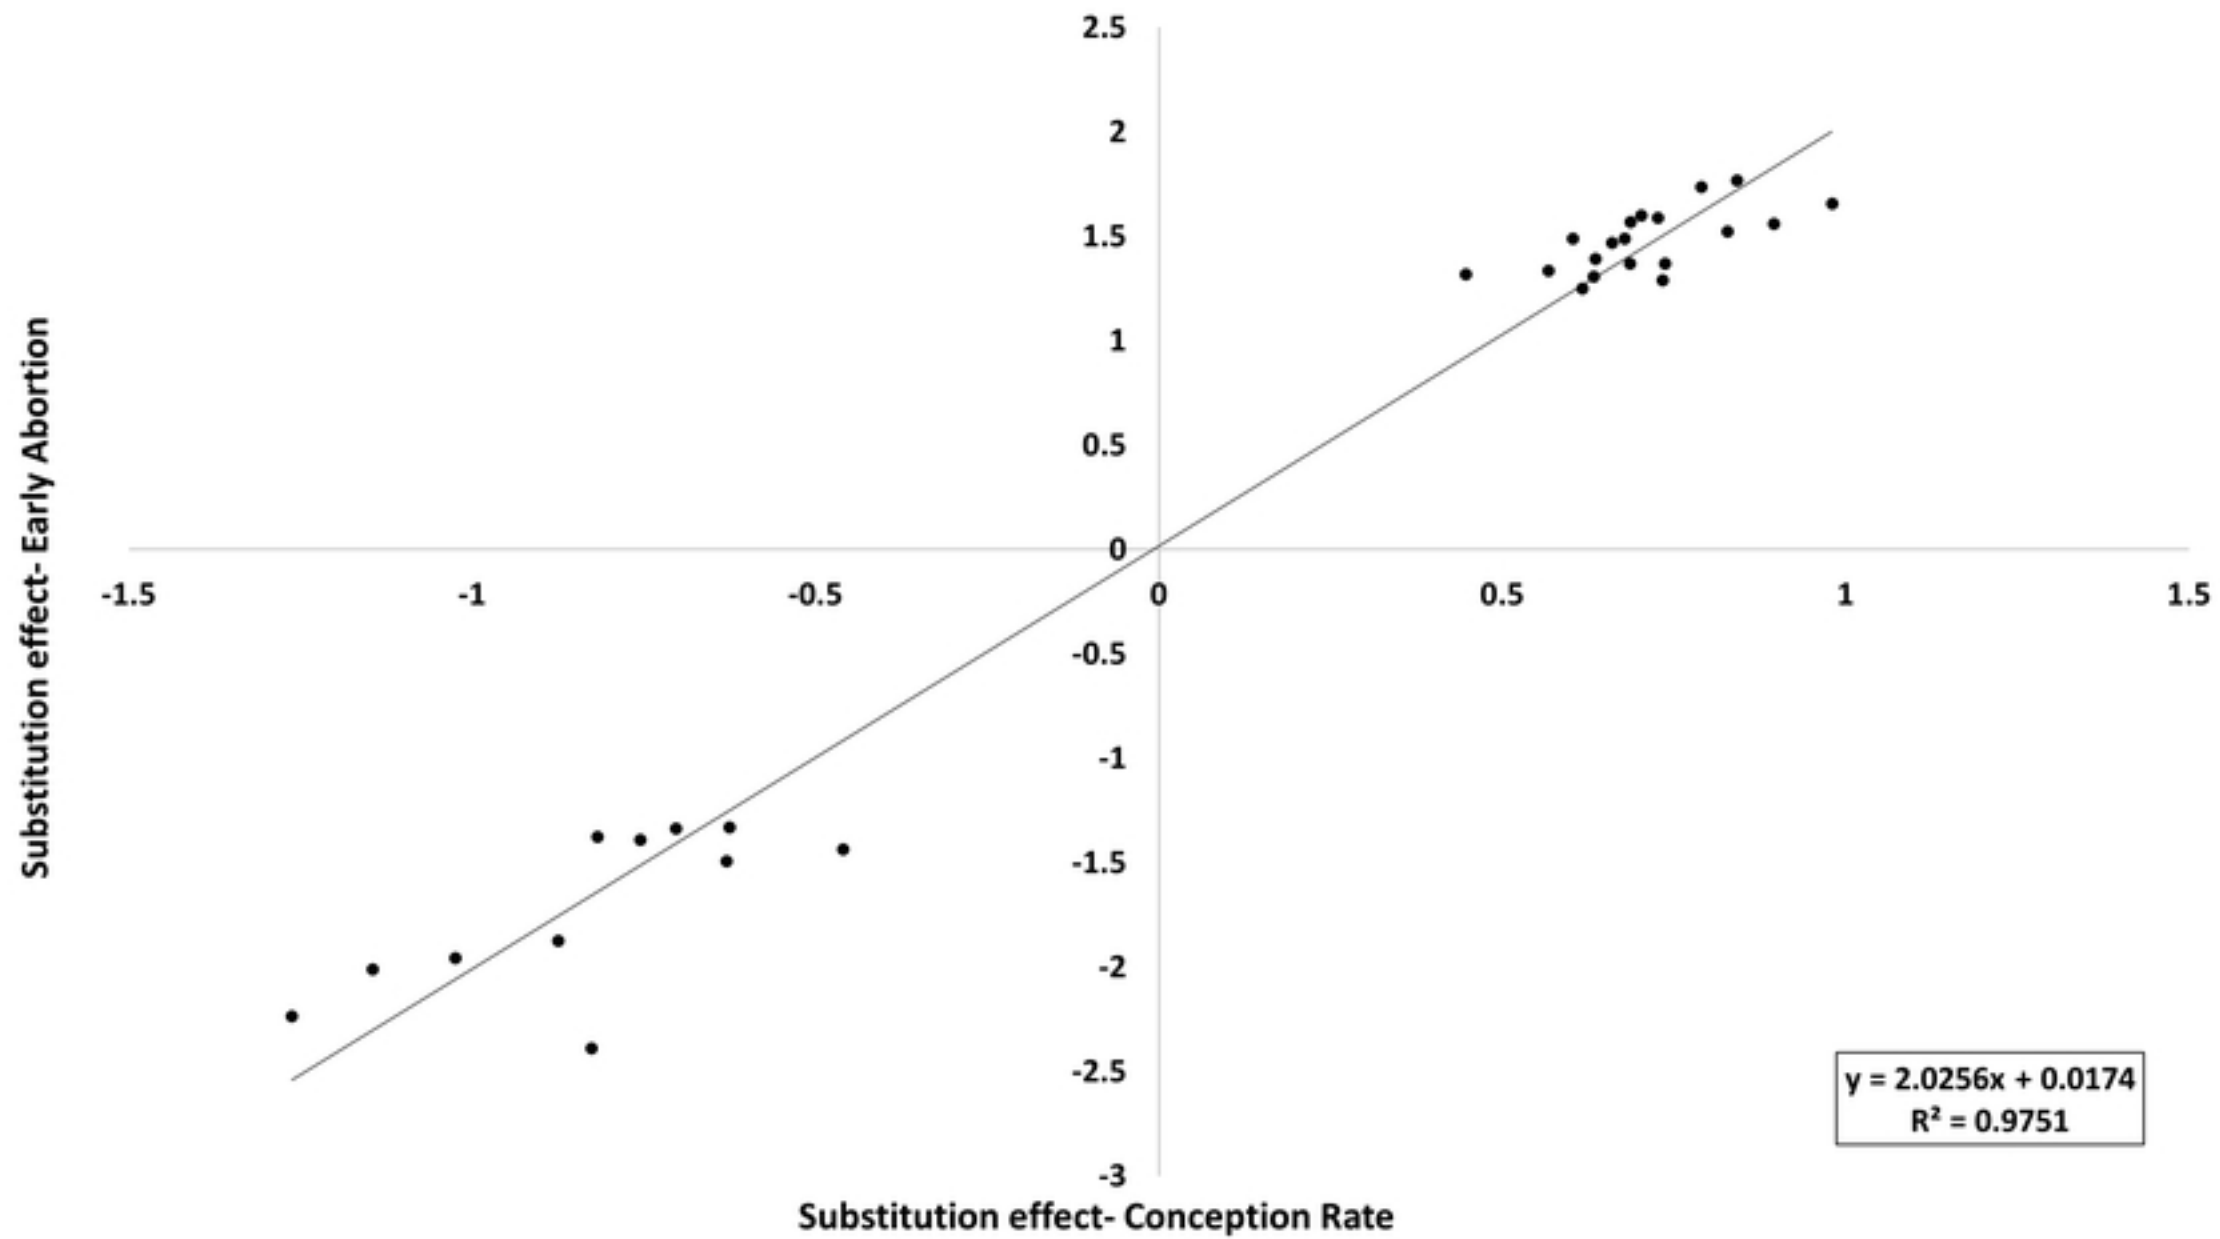

Figure 6

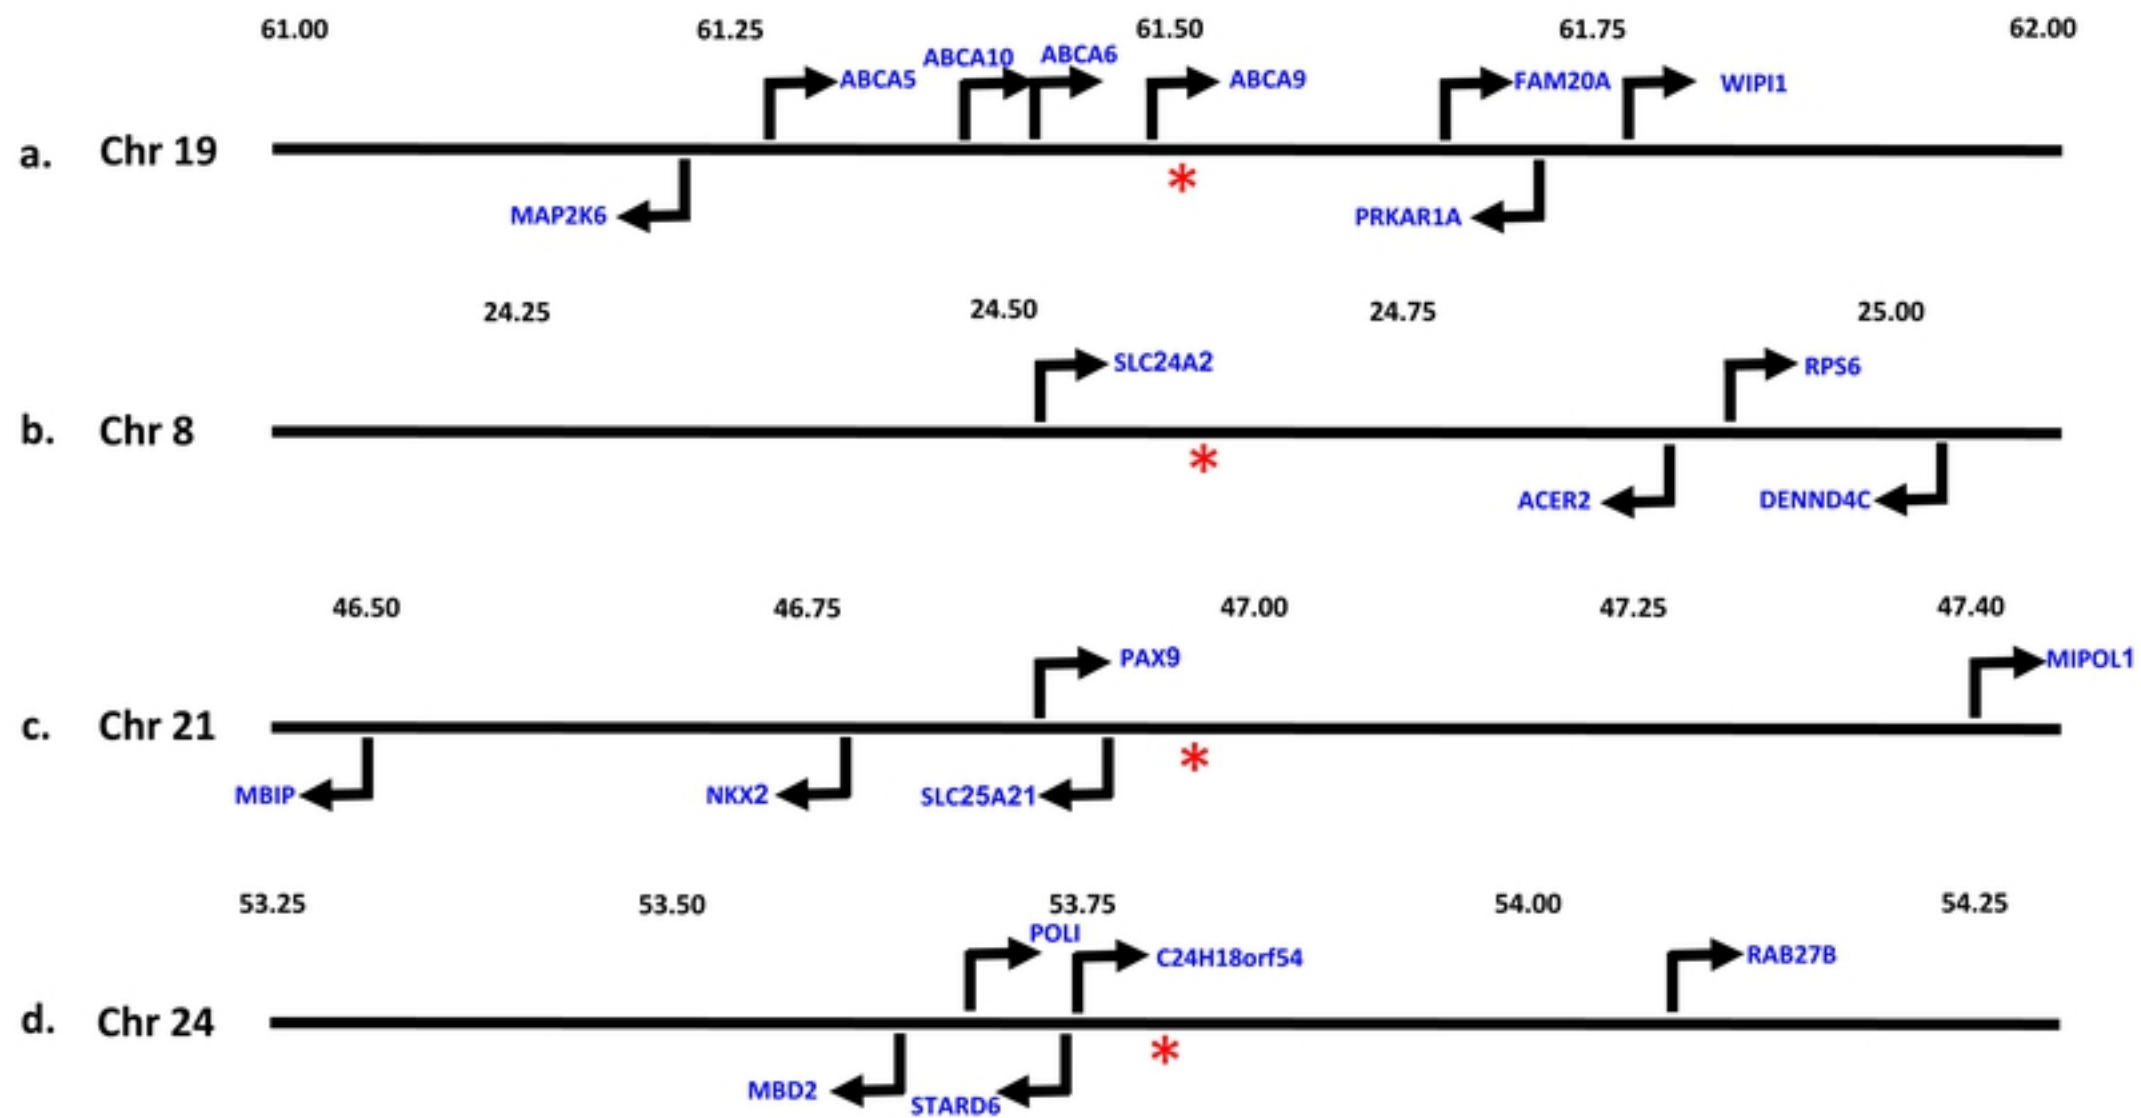

Figure 7
